# Supplementary material for: Coordination-driven multilayer of phosvitin-polyphenol functional nanofibrous membranes: antioxidant and biomineralization applications for tissue engineering
Source: Royal Society of Chemistry journal article supplement (doi:10.1039/c6ra20996c), 2016-01-01

Table S1 Element composition and content on the surface of cellulose mats and (TA/PV)<sub>9</sub>, and HAP-(TA/PV)<sub>9</sub>

| Nanofibrous<br>mats      | Atomic fraction of element composition (%) |       |      |       |       |      |
|--------------------------|--------------------------------------------|-------|------|-------|-------|------|
|                          | C                                          | O     | N    | P     | Ca    | Fe   |
| (TA/PV) <sub>9</sub>     | 62.34                                      | 31.40 | 5.98 | 0.22  | --    | 0.07 |
| HAP-(TA/PV) <sub>9</sub> | 8.3                                        | 55.73 | 0.68 | 14.46 | 20.83 | --   |

## Figure Caption

Figure S1. TEM image of cross-section of (TA/PV)<sub>9</sub> composite nanofibrous mats

Figure S1

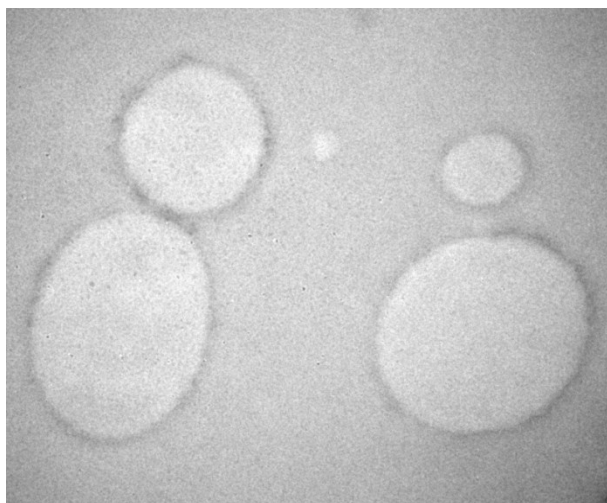

Supplement: c6ra20996c1.pdf [file c6ra20996c1.pdf]
